October 2011

# PSYCHIATRIC SERVICES

A Journal of the  
American Psychiatric  
Association

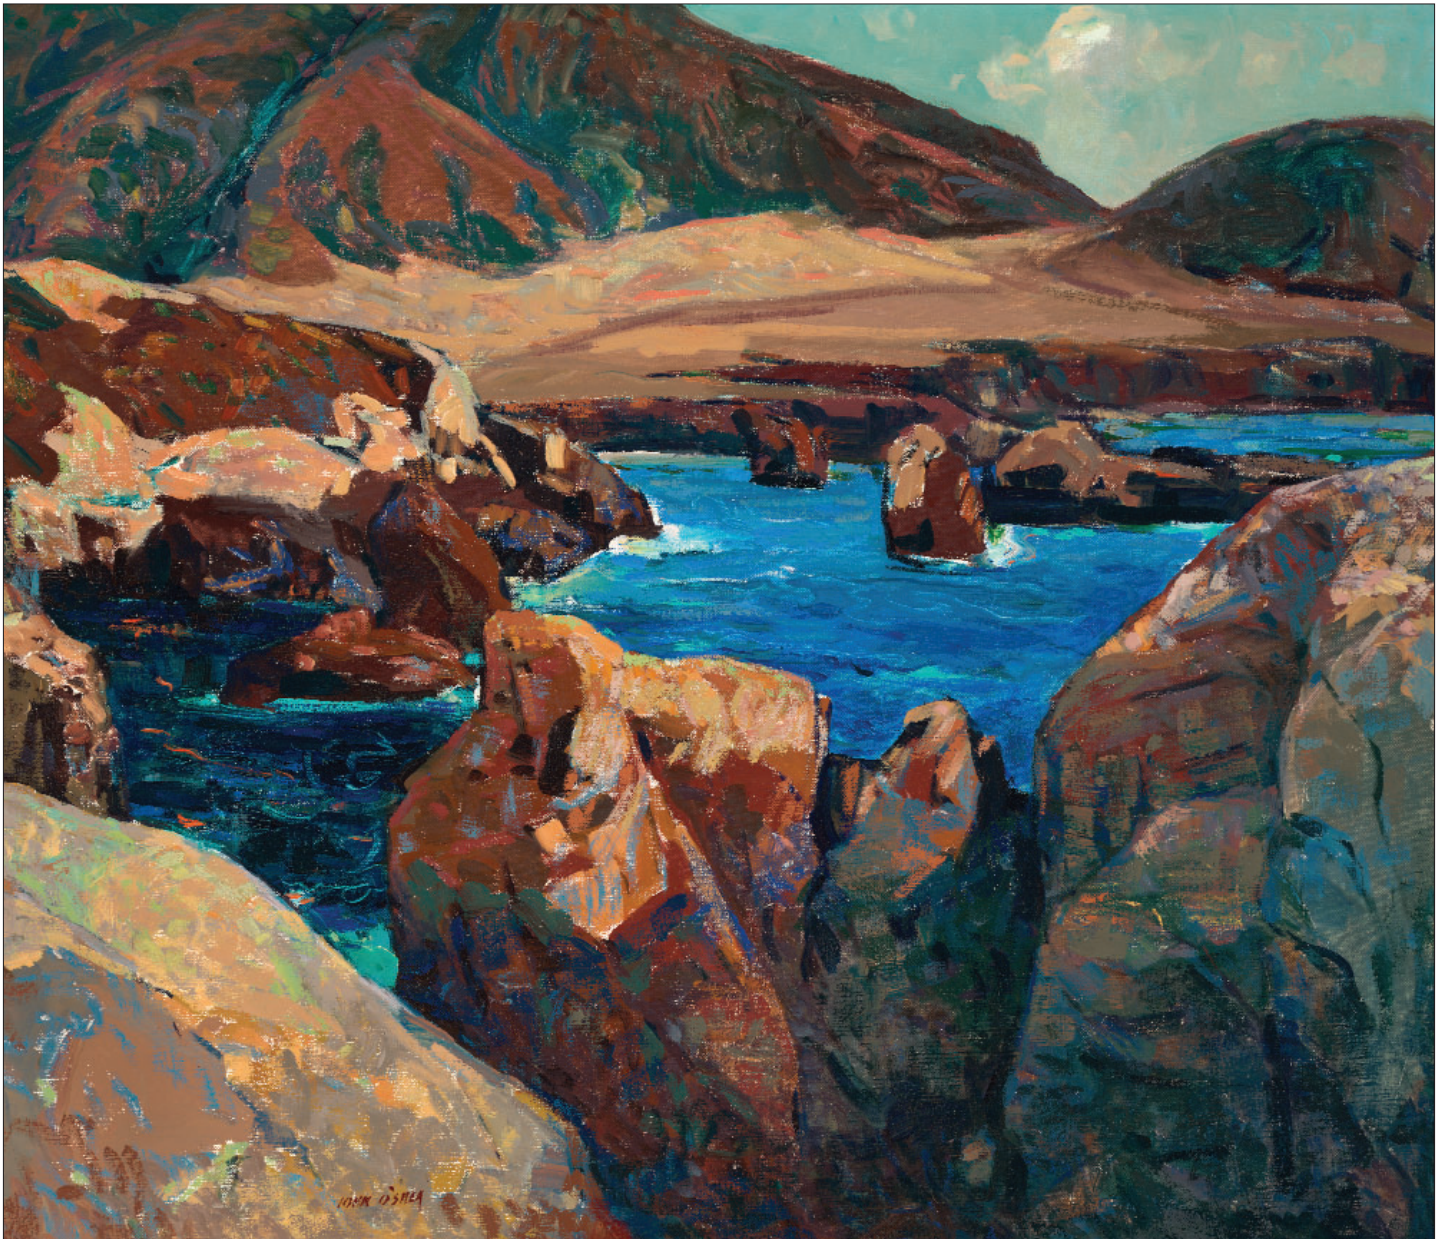

◆ High Uninsurance Rates  
Among Adults Reporting  
Frequent Mental Distress

◆ Comorbid Conditions of  
Patients With Bipolar Illness:  
National Data, 1979–2006

◆ Predicting Hospitalization  
in Schizophrenia: Analysis  
of Risk in a National Sample
